# Supplementary material
Source: publisher site journal article supplement (https://www.dovepress.com/get_supplementary_file.php?f=241670.docx)
Supplement: Supplementary file 1 [file get_supplementary_file.php]

**Supplementary file**

**Ethics approvals of study institutions**

Ethics Review Committee North South University, Bahria University Medical and Dental College, Cairo University, Ethics Committee of the University of Yaoundé, National University of Singapore Institutional Review Board, Universidad de Pamplona Ethics Committee, St. George’s University Institutional Review Board, Ethics Committee of Institute of Technology and Institute of Sciences at GITAM (Gandhi Institute of Technology and Management) University, Félix Houphouët Boigny University Ethics Committee, University of Malaya Medical Ethics committee (MECID 201412–905), University of the West Indies Ethics Committee, Kyrgyz State Medical Academy Ethics Committee, The Ethics Committee of the University of Health Sciences, Ethics Committee of the University of Antananarivo, Research and Ethical Committee of University of Medicine 1, University of Mauritius Research Ethics Committee, Research Ethics Committee of the University of Namibia, Ethics Review Committee Obafemi Awolowo University, Committee of theWestern Visayas Health Research, Ethics Committee of the Peoples’ Friendship University of Russia, Medunsa Research and Ethics Committee (MREC/H/275/2012), Committee for Research Ethics (Social Sciences) of Mahidol University (MU-SSIRB 2015/ 116(B2), National Ethics Committee for Health Research at Institut National de la Santé Publique, Ethics Committee Istanbul University, Ethics Committee of the Universidad Central de Venezuela, and Committee of Research Ethics of Hanoi School of Public Health.
